# Supplementary material
Source: publisher figshare collection journal article supplement (https://plos.figshare.com/articles/dataset/_/941370)
Supplement: Supplementary file [file 1]

### Supporting Information S1. Two-dimensional generalization procedure.

This procedure can be used to obtain a random sample of pairs of anatomical values where there may be a relationship between the pairs of real biological measurements (e.g. dorso-ventral soma position and axon initial outgrowth angle, or dendrite dorsal and ventral extents). The anatomical data consist of two values  $(v, w)$ . To generalize a set of  $N$  measurements we represent these pairs of measured coordinates  $((v_k, w_k), k = 1, \dots, N;)$  on a two dimensional plane and generate a 2-D normal distribution. The algorithm has two steps:

- 1) randomly and uniformly select one experimental measurement  $(v_k, w_k)$ ;
- 2) generate a value of for 2-D normally-distributed random variable with the mean  $(v_k, w_k)$  and some prescribed values for the standard deviations  $\sigma_v, \sigma_w$  and the correlation coefficient  $\rho > 0$ .

Main text figure 2B shows this method applied to paired dorso-ventral soma positions and axon initial outgrowth angles for two tadpole neuron types (aIN and cIN). Figure part A shows an example of dendrite generation for tadpole cIN neurons. Blue circles correspond to measured pairs of the most dorsal and the most ventral coordinates of cIN dendrites ( $N = 34$ ). Grey circles show generated pairs using the two-dimensional generalization procedure with parameters  $\sigma_d = 15, \sigma_v = 15$  and  $\rho = 0.8, N = 204$ . A positive correlation between the two sets of measurements provides the possibility to generate data allocated inside an ellipse with a long axis appropriately oriented and this ensures that the distributions of the lengths of measured and generated dendrites are similar; Figure part B shows distributions of length for measured and generated dendrites.

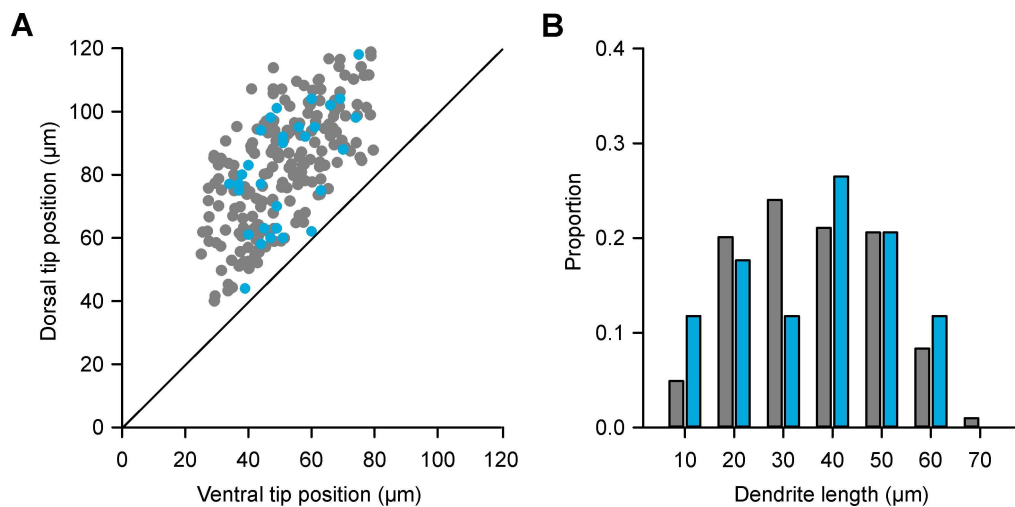

Figure. Using 2-D generalization to assign dendrite extents. A. A set of  $N = 34$  real, measured cIN dendrite coordinates (blue circles). Grey circles are the generated coordinates of 204 cIN dendrites using the following parameter values for the generalization algorithm:  $\sigma_d = 15$ ,  $\sigma_v = 15$  and  $\rho = 0.8$ . B. The length distributions of the measured (blue) and generated (grey) dendrites.
