# Supplementary material
Source: publisher figshare collection journal article supplement (https://plos.figshare.com/articles/dataset/_/941370)
Supplement: Supplementary file [file 1]

**Table S1 Connectome generation parameters**

Summary of parameters used for connectome generation together with the methods used to define them (see main text).

| Parameter description                                                                                                                                                                                                                                                                                                                                                                                                                                                                                                                                                          | Parameter notation                                                                                                                                              | Method to prescribe a value                                                                                                                                            |
|--------------------------------------------------------------------------------------------------------------------------------------------------------------------------------------------------------------------------------------------------------------------------------------------------------------------------------------------------------------------------------------------------------------------------------------------------------------------------------------------------------------------------------------------------------------------------------|-----------------------------------------------------------------------------------------------------------------------------------------------------------------|------------------------------------------------------------------------------------------------------------------------------------------------------------------------|
| <b>Environment</b><br>Gradient slopes in dorsal and ventral directions:<br>Gradient slope in rostral direction:<br>Dorsal and ventral boundaries:                                                                                                                                                                                                                                                                                                                                                                                                                              | $\beta_D, \beta_V$<br>$\beta_R$<br>$y_D, y_V$                                                                                                                   | Guidance from literature, computational trials and adjustments                                                                                                         |
| <b>Soma</b><br>Rostro-caudal and dorso-ventral coordinates in $\mu\text{m}$ (the same for current position of the axon tip):                                                                                                                                                                                                                                                                                                                                                                                                                                                   | $x, y$                                                                                                                                                          | Distribution algorithm, 2D generalization                                                                                                                              |
| <b>Primary axon</b><br>Current growth angle and initial (outgrowth) angle (radian)<br>Length from initial point to a current position of the axon tip ( $\mu\text{m}$ ) :<br>Initial 'orientation' stage sensitivities of rostral, dorsal and ventral gradients respectively:<br>'Main' stage sensitivities of rostral, dorsal and ventral gradients respectively:<br>Transitional decay rates for rostral, dorsal and ventral sensitivity functions respectively (smooth transition from initial to regular sensitivity values):<br>Variability range for the random factor : | $\theta_n, \theta_0$<br>$L(x, y)$<br>$\tilde{g}_R, \tilde{g}_D, \tilde{g}_V$<br>$\bar{g}_R, \bar{g}_D, \bar{g}_V$<br>$\gamma_R, \gamma_D, \gamma_V$<br>$\alpha$ | Iterations of difference equations, 2D generalization<br>1D generalization<br>Visual matching<br>Stochastic optimization<br>Visual matching<br>Stochastic optimization |
| <b>Secondary axon</b><br>Current growth angle and initial (outgrowth) angle (radian) :<br>Length from branching point to current position of the axon tip in $\mu\text{m}$ :<br>'Main' stage sensitivities of rostral, dorsal and ventral gradients respectively:<br>Variability range for the random factor :                                                                                                                                                                                                                                                                 | $\theta_n, \theta_0$<br>$L(x, y)$<br>$\bar{g}_R, \bar{g}_D, \bar{g}_V$<br>$\alpha$                                                                              | Iterations of difference equations, 2D generalization<br>1D generalization<br>Stochastic optimization<br>Stochastic optimization                                       |
| <b>Dendrites</b><br>Dorsal and ventral extent respectively ( $\mu\text{m}$ ) :                                                                                                                                                                                                                                                                                                                                                                                                                                                                                                 | $(v, w)$                                                                                                                                                        | 2D generalization                                                                                                                                                      |
